# Supplementary material for: A Meta-Analysis and Systematic Review of Community-Based Intimate Partner Violence Interventions in India
Source: MDPI journal article supplement (doi:10.3390/ijerph20075277), 2023-03-27
Supplement: s1 [file s1]

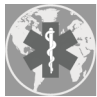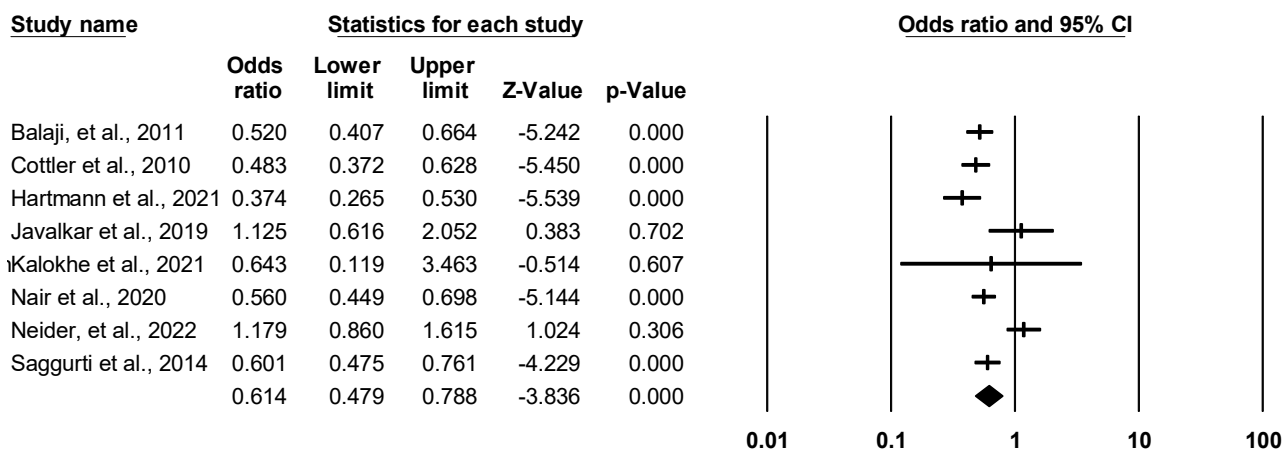

Figure S1. Forest plot for IPV Victimization (all types).

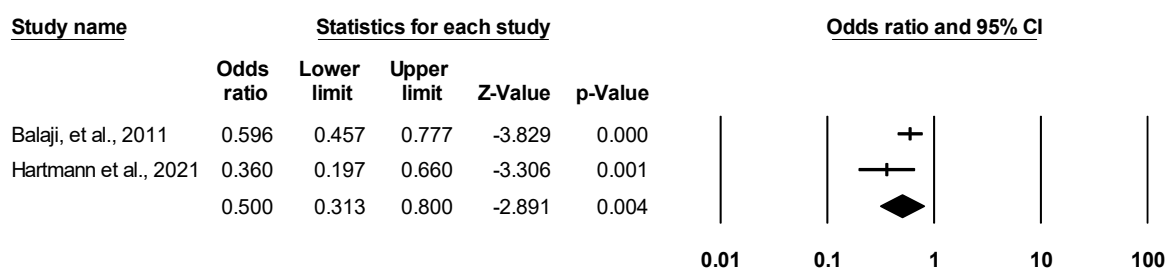

Figure S2. Forest plot for Physical IPV Victimization.

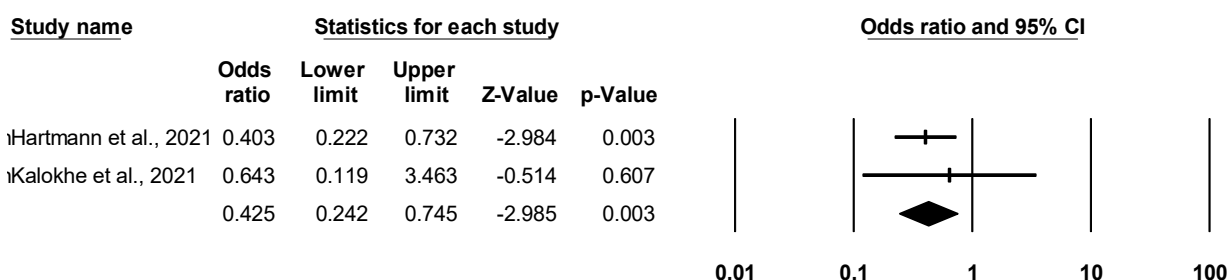

Figure S3. Forest plot for Psychological IPV Victimization.

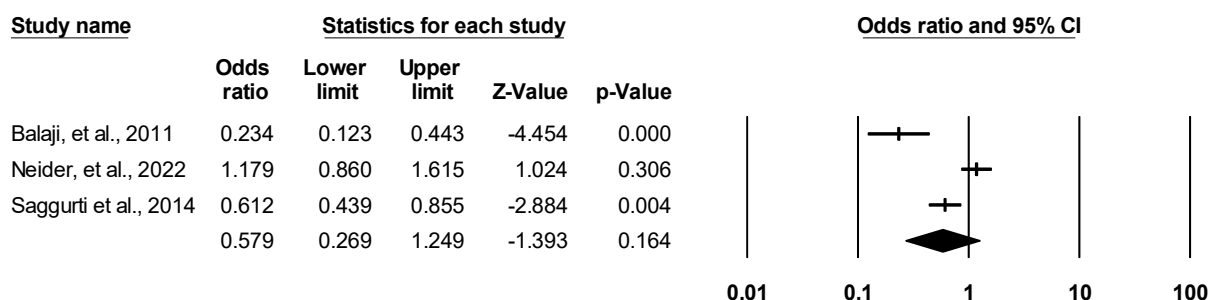

Figure S4. Forest plot for Sexual IPV Victimization.

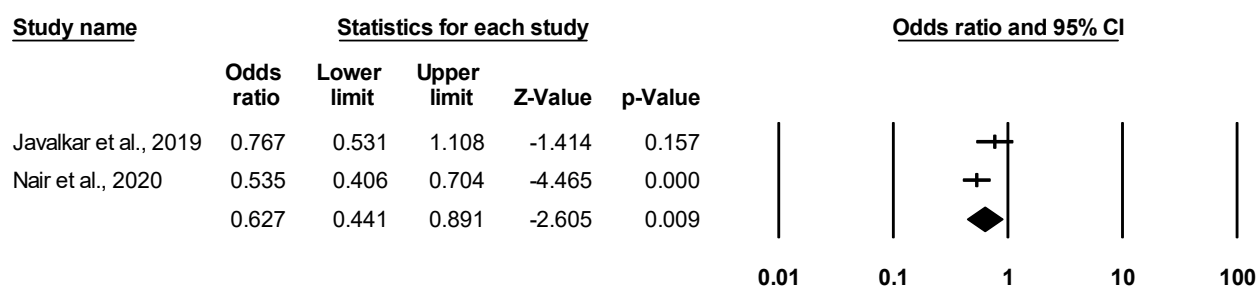

**Figure S5.** Forest plot for Approval of IPV.
